# Supplementary material
Source: HighWire-hosted journal article supplement (https://cmaj.ca/highwire/filestream/71492/field_highwire_adjunct_files/0/180232-res-1-at.pdf)
Supplement: 180232-res-1-at.pdf [file 180232-res-1-at.pdf]

**Appendix 1 (as submitted by the authors): Supplementary Table 1 and Figure 1**

| <b>Supplemental Table 1: Patient Characteristics for 1,185 Eligible COPD Patients Not Enrolled Compared to those who Were Enrolled</b> |                                   |                               |
|----------------------------------------------------------------------------------------------------------------------------------------|-----------------------------------|-------------------------------|
| <b>Characteristic</b>                                                                                                                  | <b>Not Enrolled<br/>N = 1,185</b> | <b>Enrolled<br/>N = 1,415</b> |
| <b>Age, Years (Mean, SD)</b>                                                                                                           | 70.5 (11.0)                       | 70.6 (10.6)                   |
| Range                                                                                                                                  | 50-99                             | 50-96                         |
| <b>Female (%)</b>                                                                                                                      | 600 (50.6)                        | 710 (50.2)                    |
| <b>Hospital Site (%)</b>                                                                                                               |                                   |                               |
| Ottawa Hospital General Campus                                                                                                         | 406 (34.3)                        | 313 (22.1)                    |
| Kingston General                                                                                                                       | 124 (10.5)                        | 304 (21.5)                    |
| Ottawa Hospital Civic Campus                                                                                                           | 304 (25.7)                        | 292 (20.6)                    |
| University Alberta - Edmonton                                                                                                          | 86 (7.3)                          | 220 (15.6)                    |
| Foothills - Calgary                                                                                                                    | 205 (17.3)                        | 178 (12.6)                    |
| Mount Sinai – Toronto                                                                                                                  | 60 (5.1)                          | 108 (7.6)                     |
| <b>Admitted (%)</b>                                                                                                                    | 517 (43.6)                        | 636 (44.9)                    |

**Supplemental Figure 1: Physician Data Form Used in the Study**

**RAD-2 Study – Validation of Ottawa COPD Risk Scale**

Date: (yy/mm/dd) \_\_\_/\_\_\_/\_\_\_ Patient Initials: \_\_\_ Chart No.: \_\_\_\_\_

Physician's Name (please print): \_\_\_\_\_

**Ottawa COPD Risk Scale**

**Inclusion Criteria: Adults ≥ 50 years of age with Shortness of Breath due to acute exacerbation of COPD:**

- Pre-existing diagnosis of COPD with hx of smoking, use of inhalers, OR
- New diagnosis of COPD in heavy smoker

| <p><b>Total the points for the following items:</b></p> <table style="width: 100%; border-collapse: collapse;"> <thead> <tr> <th style="text-align: left; border-bottom: 1px solid black;">Items</th> <th style="text-align: right; border-bottom: 1px solid black;">Points</th> </tr> </thead> <tbody> <tr> <td colspan="2"><b>1. Initial Assessment</b></td> </tr> <tr> <td>a) History of CABG</td> <td style="text-align: right;">(1) _____</td> </tr> <tr> <td>b) History of intervention for PVD</td> <td style="text-align: right;">(1) _____</td> </tr> <tr> <td>c) History of intubation for respiratory distress</td> <td style="text-align: right;">(2) _____</td> </tr> <tr> <td>d) Heart rate on ED arrival ≥ 110</td> <td style="text-align: right;">(2) _____</td> </tr> <tr> <td colspan="2"><b>2. Investigations</b></td> </tr> <tr> <td>a) ECG has acute ischemic changes</td> <td style="text-align: right;">(2) _____</td> </tr> <tr> <td>b) Chest x-ray has any pulmonary congestion</td> <td style="text-align: right;">(1) _____</td> </tr> <tr> <td>c) Hemoglobin &lt; 100 g/L</td> <td style="text-align: right;">(3) _____</td> </tr> <tr> <td>d) Urea ≥ 12 mmol/L</td> <td style="text-align: right;">(1) _____</td> </tr> <tr> <td>e) Serum CO<sub>2</sub> ≥ 35 mmol/L</td> <td style="text-align: right;">(1) _____</td> </tr> <tr> <td colspan="2"><b>3. Re-Assessment after ED treatment</b></td> </tr> <tr> <td>a) SaO<sub>2</sub> &lt; 90% on room air or usual O<sub>2</sub>, or HR ≥ 120</td> <td style="text-align: right;">(2) _____</td> </tr> <tr> <td colspan="2" style="text-align: right; padding-top: 10px;"><b>Total Score (0 - 16):</b> _____</td> </tr> </tbody> </table> | Items     | Points    | <b>1. Initial Assessment</b> |  | a) History of CABG | (1) _____ | b) History of intervention for PVD | (1) _____ | c) History of intubation for respiratory distress | (2) _____ | d) Heart rate on ED arrival ≥ 110 | (2) _____ | <b>2. Investigations</b> |  | a) ECG has acute ischemic changes | (2) _____ | b) Chest x-ray has any pulmonary congestion | (1) _____ | c) Hemoglobin < 100 g/L | (3) _____ | d) Urea ≥ 12 mmol/L | (1) _____ | e) Serum CO <sub>2</sub> ≥ 35 mmol/L | (1) _____ | <b>3. Re-Assessment after ED treatment</b> |  | a) SaO <sub>2</sub> < 90% on room air or usual O <sub>2</sub> , or HR ≥ 120 | (2) _____ | <b>Total Score (0 - 16):</b> _____ |  | <p><b>COPD Risk Categories for Serious Adverse Events within 14 days</b></p> <table border="1" style="width: 100%; border-collapse: collapse; text-align: center;"> <thead> <tr> <th style="border: none;">Total Score</th> <th style="border: none;">Risk</th> <th style="border: none;">Category</th> </tr> </thead> <tbody> <tr><td style="border: none;">0</td><td style="border: none;">2.2%</td><td style="border: none;">Low</td></tr> <tr><td style="border: none;">1</td><td style="border: none;">4.0%</td><td style="border: none;">Medium</td></tr> <tr><td style="border: none;">2</td><td style="border: none;">7.2%</td><td style="border: none;">Medium</td></tr> <tr><td style="border: none;">3</td><td style="border: none;">12.5%</td><td style="border: none;">High</td></tr> <tr><td style="border: none;">4</td><td style="border: none;">20.9%</td><td style="border: none;">High</td></tr> <tr><td style="border: none;">5</td><td style="border: none;">32.9%</td><td style="border: none;">Very High</td></tr> <tr><td style="border: none;">6</td><td style="border: none;">47.5%</td><td style="border: none;">Very High</td></tr> <tr><td style="border: none;">7</td><td style="border: none;">62.6%</td><td style="border: none;">Very High</td></tr> <tr><td style="border: none;">8</td><td style="border: none;">75.6%</td><td style="border: none;">Very High</td></tr> <tr><td style="border: none;">10</td><td style="border: none;">91.4%</td><td style="border: none;">Very High</td></tr> </tbody> </table> | Total Score | Risk | Category | 0 | 2.2% | Low | 1 | 4.0% | Medium | 2 | 7.2% | Medium | 3 | 12.5% | High | 4 | 20.9% | High | 5 | 32.9% | Very High | 6 | 47.5% | Very High | 7 | 62.6% | Very High | 8 | 75.6% | Very High | 10 | 91.4% | Very High |
|------------------------------------------------------------------------------------------------------------------------------------------------------------------------------------------------------------------------------------------------------------------------------------------------------------------------------------------------------------------------------------------------------------------------------------------------------------------------------------------------------------------------------------------------------------------------------------------------------------------------------------------------------------------------------------------------------------------------------------------------------------------------------------------------------------------------------------------------------------------------------------------------------------------------------------------------------------------------------------------------------------------------------------------------------------------------------------------------------------------------------------------------------------------------------------------------------------------------------------------------------------------------------------------------------------------------------------------------------------------------------------------------------------------------------------------------------------------------------------------------------------------------------------------------------------------------------------------------------------------------------------------------------------------------------------------------------------------------|-----------|-----------|------------------------------|--|--------------------|-----------|------------------------------------|-----------|---------------------------------------------------|-----------|-----------------------------------|-----------|--------------------------|--|-----------------------------------|-----------|---------------------------------------------|-----------|-------------------------|-----------|---------------------|-----------|--------------------------------------|-----------|--------------------------------------------|--|-----------------------------------------------------------------------------|-----------|------------------------------------|--|------------------------------------------------------------------------------------------------------------------------------------------------------------------------------------------------------------------------------------------------------------------------------------------------------------------------------------------------------------------------------------------------------------------------------------------------------------------------------------------------------------------------------------------------------------------------------------------------------------------------------------------------------------------------------------------------------------------------------------------------------------------------------------------------------------------------------------------------------------------------------------------------------------------------------------------------------------------------------------------------------------------------------------------------------------------------------------------------------------------------------------------------------------------------------------------------------------------------------------------------------------------------------------------------------------------------------------------------------------------------------------------------------------------------------------------------------------------------------------------------------------------------------------------------------|-------------|------|----------|---|------|-----|---|------|--------|---|------|--------|---|-------|------|---|-------|------|---|-------|-----------|---|-------|-----------|---|-------|-----------|---|-------|-----------|----|-------|-----------|
| Items                                                                                                                                                                                                                                                                                                                                                                                                                                                                                                                                                                                                                                                                                                                                                                                                                                                                                                                                                                                                                                                                                                                                                                                                                                                                                                                                                                                                                                                                                                                                                                                                                                                                                                                  | Points    |           |                              |  |                    |           |                                    |           |                                                   |           |                                   |           |                          |  |                                   |           |                                             |           |                         |           |                     |           |                                      |           |                                            |  |                                                                             |           |                                    |  |                                                                                                                                                                                                                                                                                                                                                                                                                                                                                                                                                                                                                                                                                                                                                                                                                                                                                                                                                                                                                                                                                                                                                                                                                                                                                                                                                                                                                                                                                                                                                      |             |      |          |   |      |     |   |      |        |   |      |        |   |       |      |   |       |      |   |       |           |   |       |           |   |       |           |   |       |           |    |       |           |
| <b>1. Initial Assessment</b>                                                                                                                                                                                                                                                                                                                                                                                                                                                                                                                                                                                                                                                                                                                                                                                                                                                                                                                                                                                                                                                                                                                                                                                                                                                                                                                                                                                                                                                                                                                                                                                                                                                                                           |           |           |                              |  |                    |           |                                    |           |                                                   |           |                                   |           |                          |  |                                   |           |                                             |           |                         |           |                     |           |                                      |           |                                            |  |                                                                             |           |                                    |  |                                                                                                                                                                                                                                                                                                                                                                                                                                                                                                                                                                                                                                                                                                                                                                                                                                                                                                                                                                                                                                                                                                                                                                                                                                                                                                                                                                                                                                                                                                                                                      |             |      |          |   |      |     |   |      |        |   |      |        |   |       |      |   |       |      |   |       |           |   |       |           |   |       |           |   |       |           |    |       |           |
| a) History of CABG                                                                                                                                                                                                                                                                                                                                                                                                                                                                                                                                                                                                                                                                                                                                                                                                                                                                                                                                                                                                                                                                                                                                                                                                                                                                                                                                                                                                                                                                                                                                                                                                                                                                                                     | (1) _____ |           |                              |  |                    |           |                                    |           |                                                   |           |                                   |           |                          |  |                                   |           |                                             |           |                         |           |                     |           |                                      |           |                                            |  |                                                                             |           |                                    |  |                                                                                                                                                                                                                                                                                                                                                                                                                                                                                                                                                                                                                                                                                                                                                                                                                                                                                                                                                                                                                                                                                                                                                                                                                                                                                                                                                                                                                                                                                                                                                      |             |      |          |   |      |     |   |      |        |   |      |        |   |       |      |   |       |      |   |       |           |   |       |           |   |       |           |   |       |           |    |       |           |
| b) History of intervention for PVD                                                                                                                                                                                                                                                                                                                                                                                                                                                                                                                                                                                                                                                                                                                                                                                                                                                                                                                                                                                                                                                                                                                                                                                                                                                                                                                                                                                                                                                                                                                                                                                                                                                                                     | (1) _____ |           |                              |  |                    |           |                                    |           |                                                   |           |                                   |           |                          |  |                                   |           |                                             |           |                         |           |                     |           |                                      |           |                                            |  |                                                                             |           |                                    |  |                                                                                                                                                                                                                                                                                                                                                                                                                                                                                                                                                                                                                                                                                                                                                                                                                                                                                                                                                                                                                                                                                                                                                                                                                                                                                                                                                                                                                                                                                                                                                      |             |      |          |   |      |     |   |      |        |   |      |        |   |       |      |   |       |      |   |       |           |   |       |           |   |       |           |   |       |           |    |       |           |
| c) History of intubation for respiratory distress                                                                                                                                                                                                                                                                                                                                                                                                                                                                                                                                                                                                                                                                                                                                                                                                                                                                                                                                                                                                                                                                                                                                                                                                                                                                                                                                                                                                                                                                                                                                                                                                                                                                      | (2) _____ |           |                              |  |                    |           |                                    |           |                                                   |           |                                   |           |                          |  |                                   |           |                                             |           |                         |           |                     |           |                                      |           |                                            |  |                                                                             |           |                                    |  |                                                                                                                                                                                                                                                                                                                                                                                                                                                                                                                                                                                                                                                                                                                                                                                                                                                                                                                                                                                                                                                                                                                                                                                                                                                                                                                                                                                                                                                                                                                                                      |             |      |          |   |      |     |   |      |        |   |      |        |   |       |      |   |       |      |   |       |           |   |       |           |   |       |           |   |       |           |    |       |           |
| d) Heart rate on ED arrival ≥ 110                                                                                                                                                                                                                                                                                                                                                                                                                                                                                                                                                                                                                                                                                                                                                                                                                                                                                                                                                                                                                                                                                                                                                                                                                                                                                                                                                                                                                                                                                                                                                                                                                                                                                      | (2) _____ |           |                              |  |                    |           |                                    |           |                                                   |           |                                   |           |                          |  |                                   |           |                                             |           |                         |           |                     |           |                                      |           |                                            |  |                                                                             |           |                                    |  |                                                                                                                                                                                                                                                                                                                                                                                                                                                                                                                                                                                                                                                                                                                                                                                                                                                                                                                                                                                                                                                                                                                                                                                                                                                                                                                                                                                                                                                                                                                                                      |             |      |          |   |      |     |   |      |        |   |      |        |   |       |      |   |       |      |   |       |           |   |       |           |   |       |           |   |       |           |    |       |           |
| <b>2. Investigations</b>                                                                                                                                                                                                                                                                                                                                                                                                                                                                                                                                                                                                                                                                                                                                                                                                                                                                                                                                                                                                                                                                                                                                                                                                                                                                                                                                                                                                                                                                                                                                                                                                                                                                                               |           |           |                              |  |                    |           |                                    |           |                                                   |           |                                   |           |                          |  |                                   |           |                                             |           |                         |           |                     |           |                                      |           |                                            |  |                                                                             |           |                                    |  |                                                                                                                                                                                                                                                                                                                                                                                                                                                                                                                                                                                                                                                                                                                                                                                                                                                                                                                                                                                                                                                                                                                                                                                                                                                                                                                                                                                                                                                                                                                                                      |             |      |          |   |      |     |   |      |        |   |      |        |   |       |      |   |       |      |   |       |           |   |       |           |   |       |           |   |       |           |    |       |           |
| a) ECG has acute ischemic changes                                                                                                                                                                                                                                                                                                                                                                                                                                                                                                                                                                                                                                                                                                                                                                                                                                                                                                                                                                                                                                                                                                                                                                                                                                                                                                                                                                                                                                                                                                                                                                                                                                                                                      | (2) _____ |           |                              |  |                    |           |                                    |           |                                                   |           |                                   |           |                          |  |                                   |           |                                             |           |                         |           |                     |           |                                      |           |                                            |  |                                                                             |           |                                    |  |                                                                                                                                                                                                                                                                                                                                                                                                                                                                                                                                                                                                                                                                                                                                                                                                                                                                                                                                                                                                                                                                                                                                                                                                                                                                                                                                                                                                                                                                                                                                                      |             |      |          |   |      |     |   |      |        |   |      |        |   |       |      |   |       |      |   |       |           |   |       |           |   |       |           |   |       |           |    |       |           |
| b) Chest x-ray has any pulmonary congestion                                                                                                                                                                                                                                                                                                                                                                                                                                                                                                                                                                                                                                                                                                                                                                                                                                                                                                                                                                                                                                                                                                                                                                                                                                                                                                                                                                                                                                                                                                                                                                                                                                                                            | (1) _____ |           |                              |  |                    |           |                                    |           |                                                   |           |                                   |           |                          |  |                                   |           |                                             |           |                         |           |                     |           |                                      |           |                                            |  |                                                                             |           |                                    |  |                                                                                                                                                                                                                                                                                                                                                                                                                                                                                                                                                                                                                                                                                                                                                                                                                                                                                                                                                                                                                                                                                                                                                                                                                                                                                                                                                                                                                                                                                                                                                      |             |      |          |   |      |     |   |      |        |   |      |        |   |       |      |   |       |      |   |       |           |   |       |           |   |       |           |   |       |           |    |       |           |
| c) Hemoglobin < 100 g/L                                                                                                                                                                                                                                                                                                                                                                                                                                                                                                                                                                                                                                                                                                                                                                                                                                                                                                                                                                                                                                                                                                                                                                                                                                                                                                                                                                                                                                                                                                                                                                                                                                                                                                | (3) _____ |           |                              |  |                    |           |                                    |           |                                                   |           |                                   |           |                          |  |                                   |           |                                             |           |                         |           |                     |           |                                      |           |                                            |  |                                                                             |           |                                    |  |                                                                                                                                                                                                                                                                                                                                                                                                                                                                                                                                                                                                                                                                                                                                                                                                                                                                                                                                                                                                                                                                                                                                                                                                                                                                                                                                                                                                                                                                                                                                                      |             |      |          |   |      |     |   |      |        |   |      |        |   |       |      |   |       |      |   |       |           |   |       |           |   |       |           |   |       |           |    |       |           |
| d) Urea ≥ 12 mmol/L                                                                                                                                                                                                                                                                                                                                                                                                                                                                                                                                                                                                                                                                                                                                                                                                                                                                                                                                                                                                                                                                                                                                                                                                                                                                                                                                                                                                                                                                                                                                                                                                                                                                                                    | (1) _____ |           |                              |  |                    |           |                                    |           |                                                   |           |                                   |           |                          |  |                                   |           |                                             |           |                         |           |                     |           |                                      |           |                                            |  |                                                                             |           |                                    |  |                                                                                                                                                                                                                                                                                                                                                                                                                                                                                                                                                                                                                                                                                                                                                                                                                                                                                                                                                                                                                                                                                                                                                                                                                                                                                                                                                                                                                                                                                                                                                      |             |      |          |   |      |     |   |      |        |   |      |        |   |       |      |   |       |      |   |       |           |   |       |           |   |       |           |   |       |           |    |       |           |
| e) Serum CO <sub>2</sub> ≥ 35 mmol/L                                                                                                                                                                                                                                                                                                                                                                                                                                                                                                                                                                                                                                                                                                                                                                                                                                                                                                                                                                                                                                                                                                                                                                                                                                                                                                                                                                                                                                                                                                                                                                                                                                                                                   | (1) _____ |           |                              |  |                    |           |                                    |           |                                                   |           |                                   |           |                          |  |                                   |           |                                             |           |                         |           |                     |           |                                      |           |                                            |  |                                                                             |           |                                    |  |                                                                                                                                                                                                                                                                                                                                                                                                                                                                                                                                                                                                                                                                                                                                                                                                                                                                                                                                                                                                                                                                                                                                                                                                                                                                                                                                                                                                                                                                                                                                                      |             |      |          |   |      |     |   |      |        |   |      |        |   |       |      |   |       |      |   |       |           |   |       |           |   |       |           |   |       |           |    |       |           |
| <b>3. Re-Assessment after ED treatment</b>                                                                                                                                                                                                                                                                                                                                                                                                                                                                                                                                                                                                                                                                                                                                                                                                                                                                                                                                                                                                                                                                                                                                                                                                                                                                                                                                                                                                                                                                                                                                                                                                                                                                             |           |           |                              |  |                    |           |                                    |           |                                                   |           |                                   |           |                          |  |                                   |           |                                             |           |                         |           |                     |           |                                      |           |                                            |  |                                                                             |           |                                    |  |                                                                                                                                                                                                                                                                                                                                                                                                                                                                                                                                                                                                                                                                                                                                                                                                                                                                                                                                                                                                                                                                                                                                                                                                                                                                                                                                                                                                                                                                                                                                                      |             |      |          |   |      |     |   |      |        |   |      |        |   |       |      |   |       |      |   |       |           |   |       |           |   |       |           |   |       |           |    |       |           |
| a) SaO <sub>2</sub> < 90% on room air or usual O <sub>2</sub> , or HR ≥ 120                                                                                                                                                                                                                                                                                                                                                                                                                                                                                                                                                                                                                                                                                                                                                                                                                                                                                                                                                                                                                                                                                                                                                                                                                                                                                                                                                                                                                                                                                                                                                                                                                                            | (2) _____ |           |                              |  |                    |           |                                    |           |                                                   |           |                                   |           |                          |  |                                   |           |                                             |           |                         |           |                     |           |                                      |           |                                            |  |                                                                             |           |                                    |  |                                                                                                                                                                                                                                                                                                                                                                                                                                                                                                                                                                                                                                                                                                                                                                                                                                                                                                                                                                                                                                                                                                                                                                                                                                                                                                                                                                                                                                                                                                                                                      |             |      |          |   |      |     |   |      |        |   |      |        |   |       |      |   |       |      |   |       |           |   |       |           |   |       |           |   |       |           |    |       |           |
| <b>Total Score (0 - 16):</b> _____                                                                                                                                                                                                                                                                                                                                                                                                                                                                                                                                                                                                                                                                                                                                                                                                                                                                                                                                                                                                                                                                                                                                                                                                                                                                                                                                                                                                                                                                                                                                                                                                                                                                                     |           |           |                              |  |                    |           |                                    |           |                                                   |           |                                   |           |                          |  |                                   |           |                                             |           |                         |           |                     |           |                                      |           |                                            |  |                                                                             |           |                                    |  |                                                                                                                                                                                                                                                                                                                                                                                                                                                                                                                                                                                                                                                                                                                                                                                                                                                                                                                                                                                                                                                                                                                                                                                                                                                                                                                                                                                                                                                                                                                                                      |             |      |          |   |      |     |   |      |        |   |      |        |   |       |      |   |       |      |   |       |           |   |       |           |   |       |           |   |       |           |    |       |           |
| Total Score                                                                                                                                                                                                                                                                                                                                                                                                                                                                                                                                                                                                                                                                                                                                                                                                                                                                                                                                                                                                                                                                                                                                                                                                                                                                                                                                                                                                                                                                                                                                                                                                                                                                                                            | Risk      | Category  |                              |  |                    |           |                                    |           |                                                   |           |                                   |           |                          |  |                                   |           |                                             |           |                         |           |                     |           |                                      |           |                                            |  |                                                                             |           |                                    |  |                                                                                                                                                                                                                                                                                                                                                                                                                                                                                                                                                                                                                                                                                                                                                                                                                                                                                                                                                                                                                                                                                                                                                                                                                                                                                                                                                                                                                                                                                                                                                      |             |      |          |   |      |     |   |      |        |   |      |        |   |       |      |   |       |      |   |       |           |   |       |           |   |       |           |   |       |           |    |       |           |
| 0                                                                                                                                                                                                                                                                                                                                                                                                                                                                                                                                                                                                                                                                                                                                                                                                                                                                                                                                                                                                                                                                                                                                                                                                                                                                                                                                                                                                                                                                                                                                                                                                                                                                                                                      | 2.2%      | Low       |                              |  |                    |           |                                    |           |                                                   |           |                                   |           |                          |  |                                   |           |                                             |           |                         |           |                     |           |                                      |           |                                            |  |                                                                             |           |                                    |  |                                                                                                                                                                                                                                                                                                                                                                                                                                                                                                                                                                                                                                                                                                                                                                                                                                                                                                                                                                                                                                                                                                                                                                                                                                                                                                                                                                                                                                                                                                                                                      |             |      |          |   |      |     |   |      |        |   |      |        |   |       |      |   |       |      |   |       |           |   |       |           |   |       |           |   |       |           |    |       |           |
| 1                                                                                                                                                                                                                                                                                                                                                                                                                                                                                                                                                                                                                                                                                                                                                                                                                                                                                                                                                                                                                                                                                                                                                                                                                                                                                                                                                                                                                                                                                                                                                                                                                                                                                                                      | 4.0%      | Medium    |                              |  |                    |           |                                    |           |                                                   |           |                                   |           |                          |  |                                   |           |                                             |           |                         |           |                     |           |                                      |           |                                            |  |                                                                             |           |                                    |  |                                                                                                                                                                                                                                                                                                                                                                                                                                                                                                                                                                                                                                                                                                                                                                                                                                                                                                                                                                                                                                                                                                                                                                                                                                                                                                                                                                                                                                                                                                                                                      |             |      |          |   |      |     |   |      |        |   |      |        |   |       |      |   |       |      |   |       |           |   |       |           |   |       |           |   |       |           |    |       |           |
| 2                                                                                                                                                                                                                                                                                                                                                                                                                                                                                                                                                                                                                                                                                                                                                                                                                                                                                                                                                                                                                                                                                                                                                                                                                                                                                                                                                                                                                                                                                                                                                                                                                                                                                                                      | 7.2%      | Medium    |                              |  |                    |           |                                    |           |                                                   |           |                                   |           |                          |  |                                   |           |                                             |           |                         |           |                     |           |                                      |           |                                            |  |                                                                             |           |                                    |  |                                                                                                                                                                                                                                                                                                                                                                                                                                                                                                                                                                                                                                                                                                                                                                                                                                                                                                                                                                                                                                                                                                                                                                                                                                                                                                                                                                                                                                                                                                                                                      |             |      |          |   |      |     |   |      |        |   |      |        |   |       |      |   |       |      |   |       |           |   |       |           |   |       |           |   |       |           |    |       |           |
| 3                                                                                                                                                                                                                                                                                                                                                                                                                                                                                                                                                                                                                                                                                                                                                                                                                                                                                                                                                                                                                                                                                                                                                                                                                                                                                                                                                                                                                                                                                                                                                                                                                                                                                                                      | 12.5%     | High      |                              |  |                    |           |                                    |           |                                                   |           |                                   |           |                          |  |                                   |           |                                             |           |                         |           |                     |           |                                      |           |                                            |  |                                                                             |           |                                    |  |                                                                                                                                                                                                                                                                                                                                                                                                                                                                                                                                                                                                                                                                                                                                                                                                                                                                                                                                                                                                                                                                                                                                                                                                                                                                                                                                                                                                                                                                                                                                                      |             |      |          |   |      |     |   |      |        |   |      |        |   |       |      |   |       |      |   |       |           |   |       |           |   |       |           |   |       |           |    |       |           |
| 4                                                                                                                                                                                                                                                                                                                                                                                                                                                                                                                                                                                                                                                                                                                                                                                                                                                                                                                                                                                                                                                                                                                                                                                                                                                                                                                                                                                                                                                                                                                                                                                                                                                                                                                      | 20.9%     | High      |                              |  |                    |           |                                    |           |                                                   |           |                                   |           |                          |  |                                   |           |                                             |           |                         |           |                     |           |                                      |           |                                            |  |                                                                             |           |                                    |  |                                                                                                                                                                                                                                                                                                                                                                                                                                                                                                                                                                                                                                                                                                                                                                                                                                                                                                                                                                                                                                                                                                                                                                                                                                                                                                                                                                                                                                                                                                                                                      |             |      |          |   |      |     |   |      |        |   |      |        |   |       |      |   |       |      |   |       |           |   |       |           |   |       |           |   |       |           |    |       |           |
| 5                                                                                                                                                                                                                                                                                                                                                                                                                                                                                                                                                                                                                                                                                                                                                                                                                                                                                                                                                                                                                                                                                                                                                                                                                                                                                                                                                                                                                                                                                                                                                                                                                                                                                                                      | 32.9%     | Very High |                              |  |                    |           |                                    |           |                                                   |           |                                   |           |                          |  |                                   |           |                                             |           |                         |           |                     |           |                                      |           |                                            |  |                                                                             |           |                                    |  |                                                                                                                                                                                                                                                                                                                                                                                                                                                                                                                                                                                                                                                                                                                                                                                                                                                                                                                                                                                                                                                                                                                                                                                                                                                                                                                                                                                                                                                                                                                                                      |             |      |          |   |      |     |   |      |        |   |      |        |   |       |      |   |       |      |   |       |           |   |       |           |   |       |           |   |       |           |    |       |           |
| 6                                                                                                                                                                                                                                                                                                                                                                                                                                                                                                                                                                                                                                                                                                                                                                                                                                                                                                                                                                                                                                                                                                                                                                                                                                                                                                                                                                                                                                                                                                                                                                                                                                                                                                                      | 47.5%     | Very High |                              |  |                    |           |                                    |           |                                                   |           |                                   |           |                          |  |                                   |           |                                             |           |                         |           |                     |           |                                      |           |                                            |  |                                                                             |           |                                    |  |                                                                                                                                                                                                                                                                                                                                                                                                                                                                                                                                                                                                                                                                                                                                                                                                                                                                                                                                                                                                                                                                                                                                                                                                                                                                                                                                                                                                                                                                                                                                                      |             |      |          |   |      |     |   |      |        |   |      |        |   |       |      |   |       |      |   |       |           |   |       |           |   |       |           |   |       |           |    |       |           |
| 7                                                                                                                                                                                                                                                                                                                                                                                                                                                                                                                                                                                                                                                                                                                                                                                                                                                                                                                                                                                                                                                                                                                                                                                                                                                                                                                                                                                                                                                                                                                                                                                                                                                                                                                      | 62.6%     | Very High |                              |  |                    |           |                                    |           |                                                   |           |                                   |           |                          |  |                                   |           |                                             |           |                         |           |                     |           |                                      |           |                                            |  |                                                                             |           |                                    |  |                                                                                                                                                                                                                                                                                                                                                                                                                                                                                                                                                                                                                                                                                                                                                                                                                                                                                                                                                                                                                                                                                                                                                                                                                                                                                                                                                                                                                                                                                                                                                      |             |      |          |   |      |     |   |      |        |   |      |        |   |       |      |   |       |      |   |       |           |   |       |           |   |       |           |   |       |           |    |       |           |
| 8                                                                                                                                                                                                                                                                                                                                                                                                                                                                                                                                                                                                                                                                                                                                                                                                                                                                                                                                                                                                                                                                                                                                                                                                                                                                                                                                                                                                                                                                                                                                                                                                                                                                                                                      | 75.6%     | Very High |                              |  |                    |           |                                    |           |                                                   |           |                                   |           |                          |  |                                   |           |                                             |           |                         |           |                     |           |                                      |           |                                            |  |                                                                             |           |                                    |  |                                                                                                                                                                                                                                                                                                                                                                                                                                                                                                                                                                                                                                                                                                                                                                                                                                                                                                                                                                                                                                                                                                                                                                                                                                                                                                                                                                                                                                                                                                                                                      |             |      |          |   |      |     |   |      |        |   |      |        |   |       |      |   |       |      |   |       |           |   |       |           |   |       |           |   |       |           |    |       |           |
| 10                                                                                                                                                                                                                                                                                                                                                                                                                                                                                                                                                                                                                                                                                                                                                                                                                                                                                                                                                                                                                                                                                                                                                                                                                                                                                                                                                                                                                                                                                                                                                                                                                                                                                                                     | 91.4%     | Very High |                              |  |                    |           |                                    |           |                                                   |           |                                   |           |                          |  |                                   |           |                                             |           |                         |           |                     |           |                                      |           |                                            |  |                                                                             |           |                                    |  |                                                                                                                                                                                                                                                                                                                                                                                                                                                                                                                                                                                                                                                                                                                                                                                                                                                                                                                                                                                                                                                                                                                                                                                                                                                                                                                                                                                                                                                                                                                                                      |             |      |          |   |      |     |   |      |        |   |      |        |   |       |      |   |       |      |   |       |           |   |       |           |   |       |           |   |       |           |    |       |           |

**A) According to the Risk Scale, what is the estimated risk category for this patient? (see above)**  
 low     medium     high     very high

**B) How comfortable would you be using this scale to assist making a disposition decision for this patient?**  
 very comfortable     comfortable     neutral     uncomfortable     very uncomfortable

**C) Please request the following:**  
 Venous blood gas

**D) Please have RN measure vitals at 4-8 hours after treatment:**  
 Heart Rate: \_\_\_\_\_ SaO<sub>2</sub> on Room Air: \_\_\_\_\_

**Thank you for your help!**
